# Supplementary material for: Pramlintide: A Novel Therapeutic Approach for Osteosarcoma through Metabolic Reprogramming
Source: MDPI journal article supplement (doi:10.3390/cancers14174310), 2022-09-02
Supplement: s1 [file s1]

Figure 1A

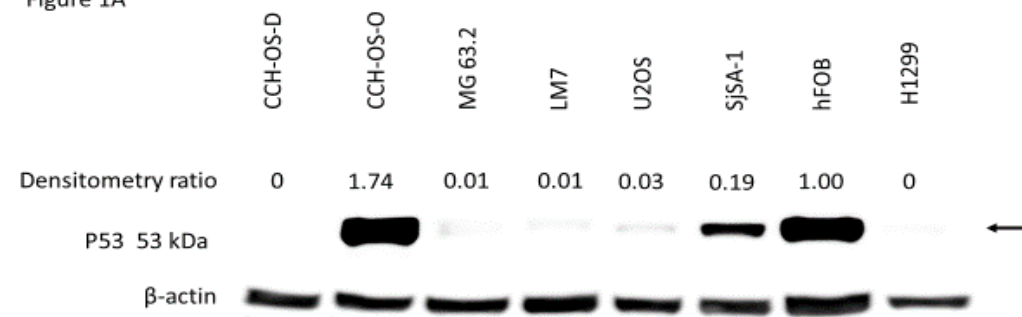

50KD →

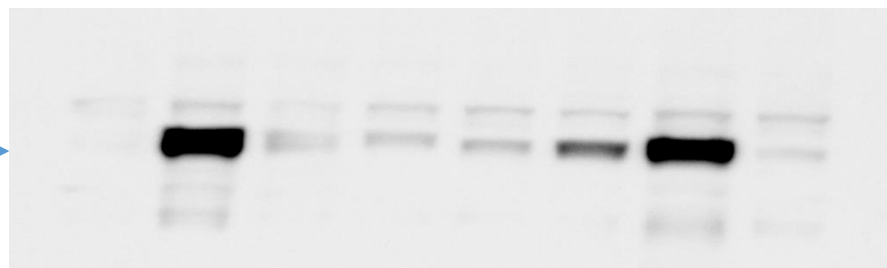

Figure 1B

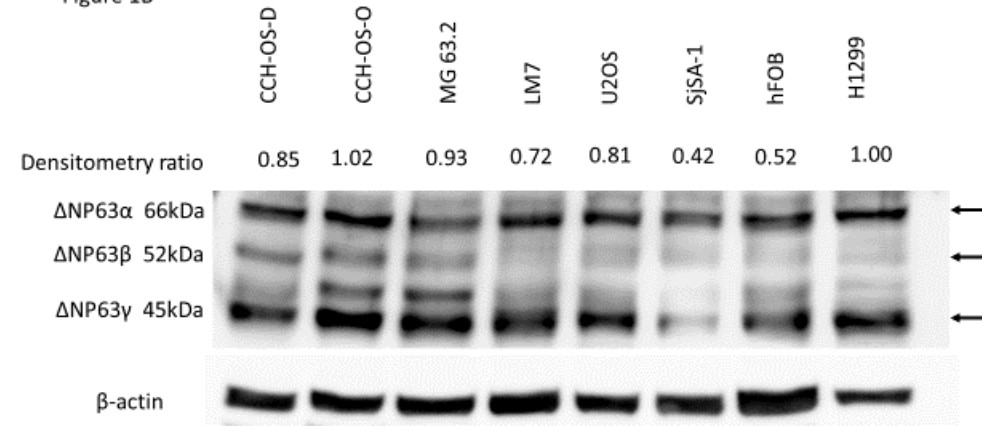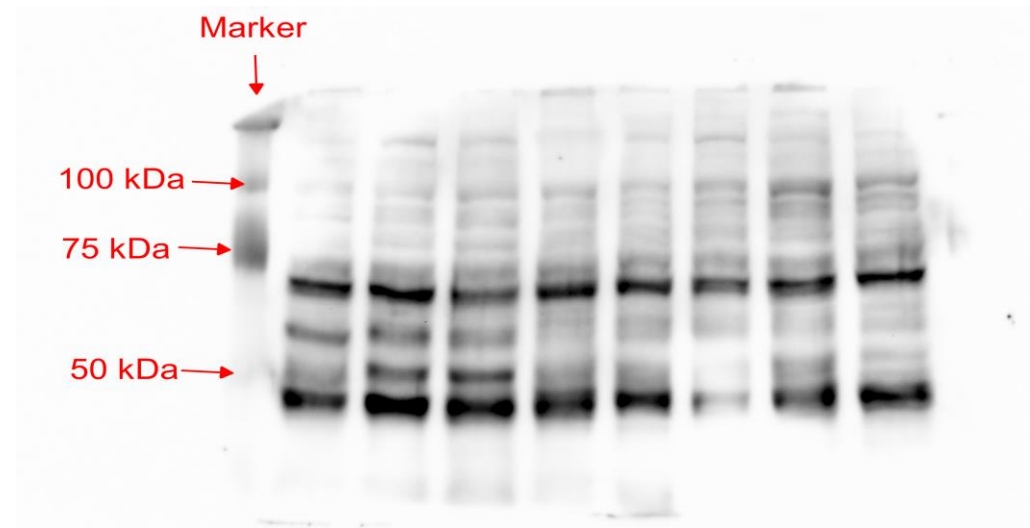

Figure 1C

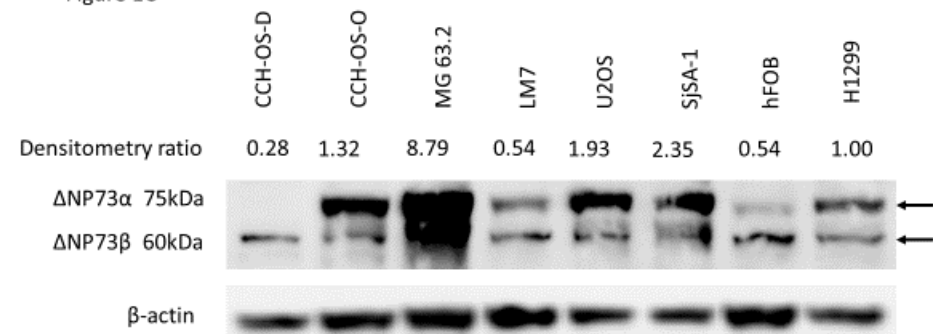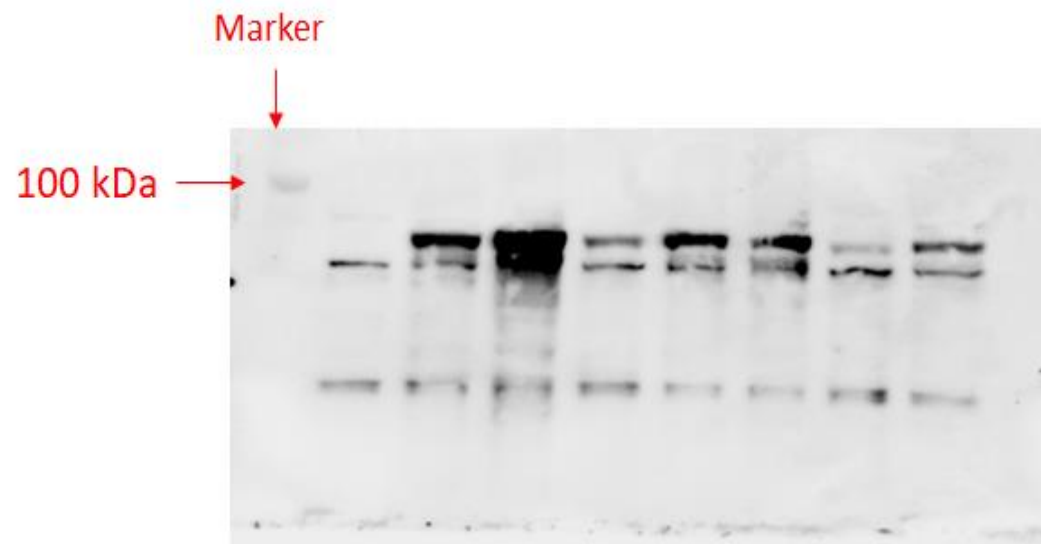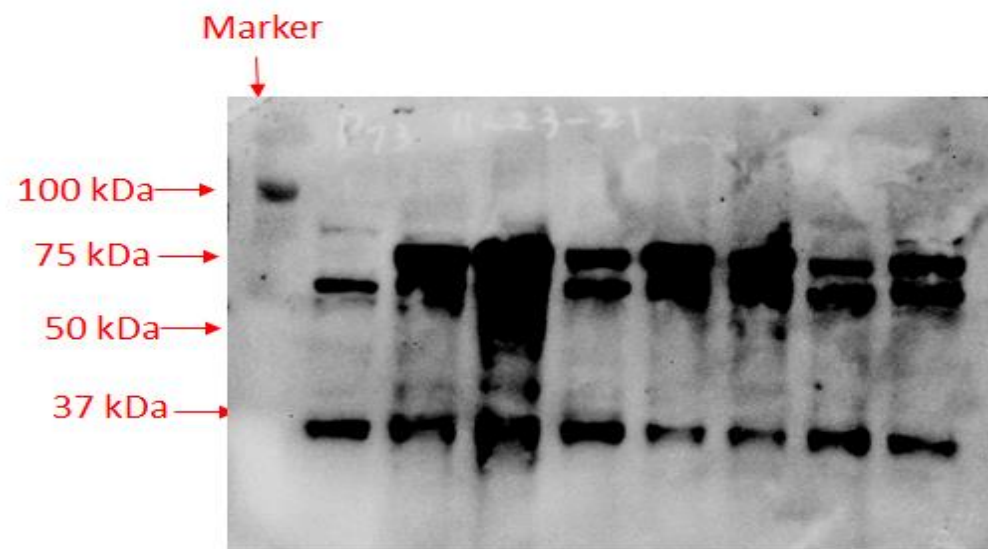

Figure 1D

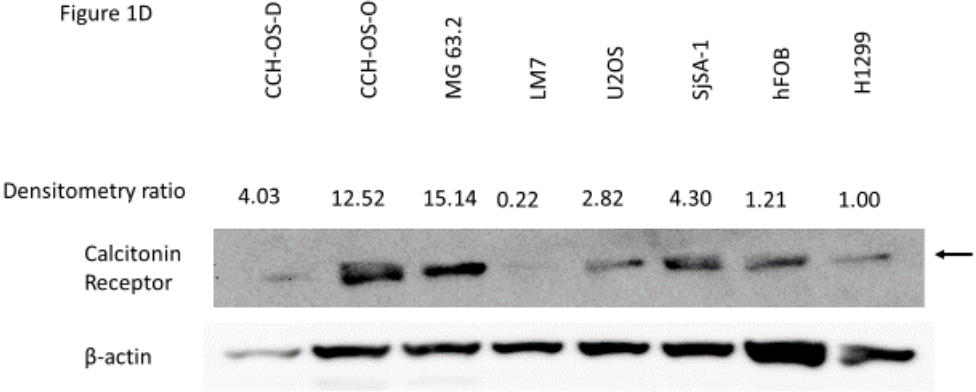

Marker

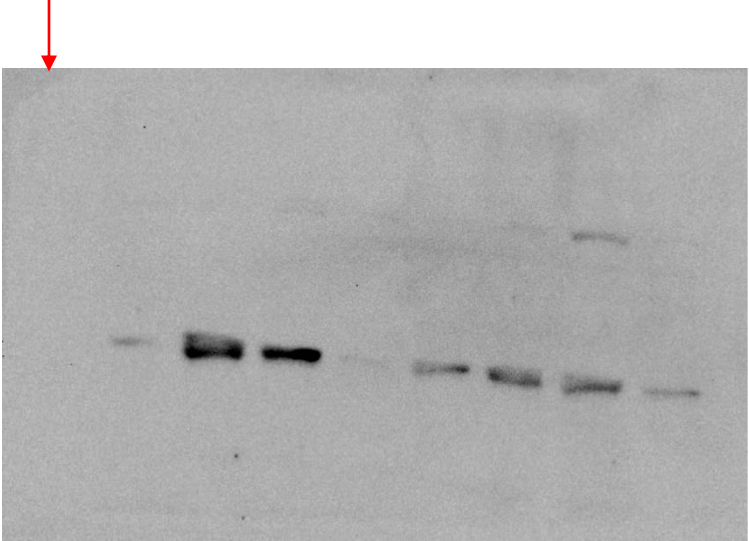

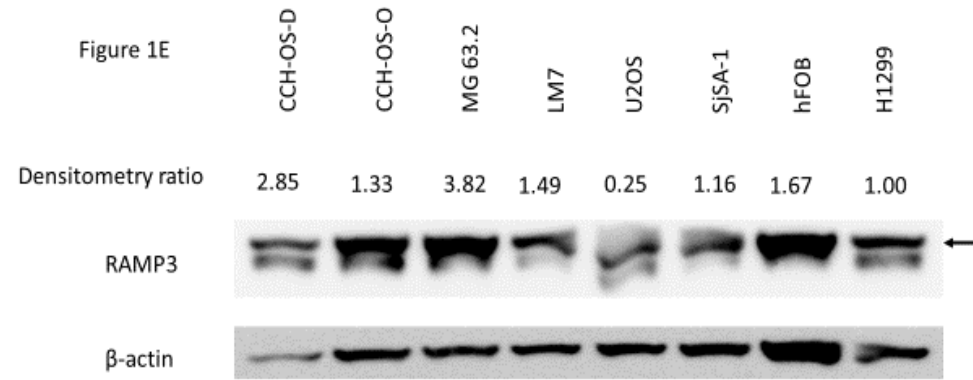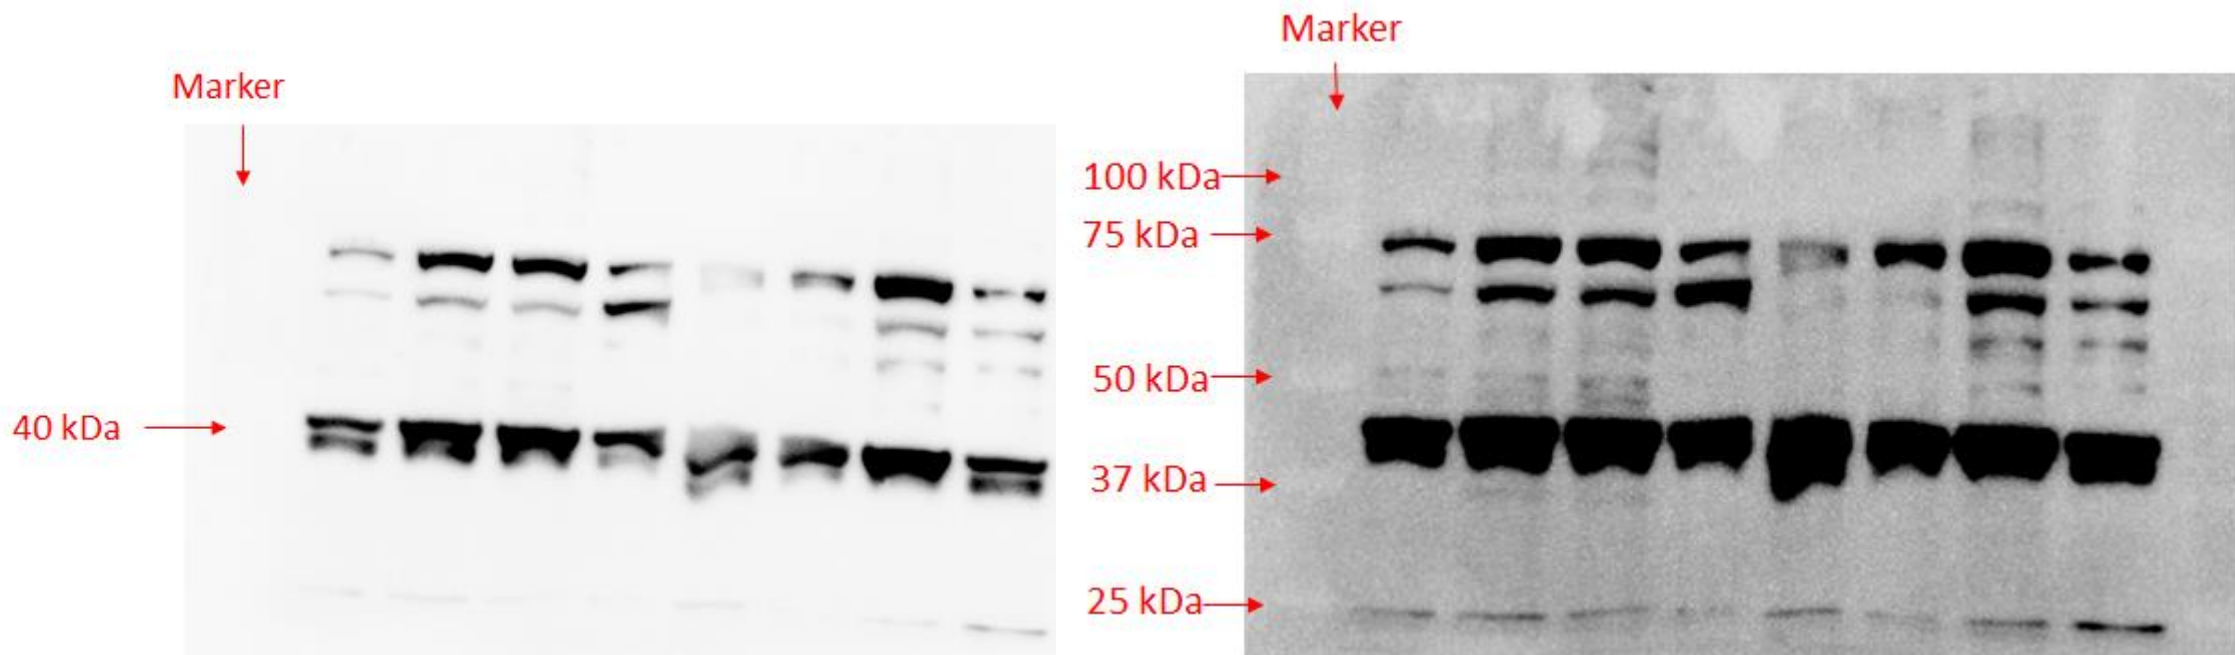

Figure 1F

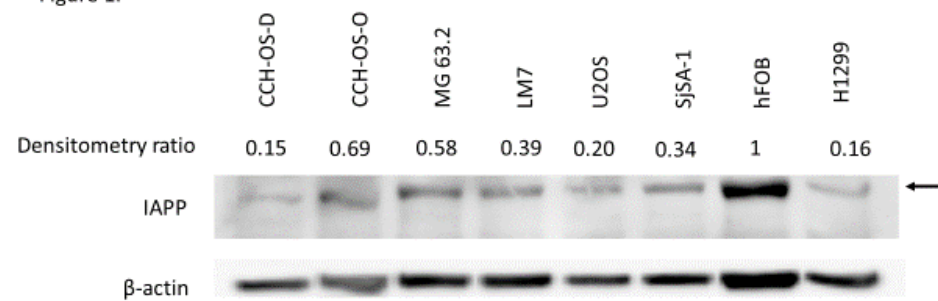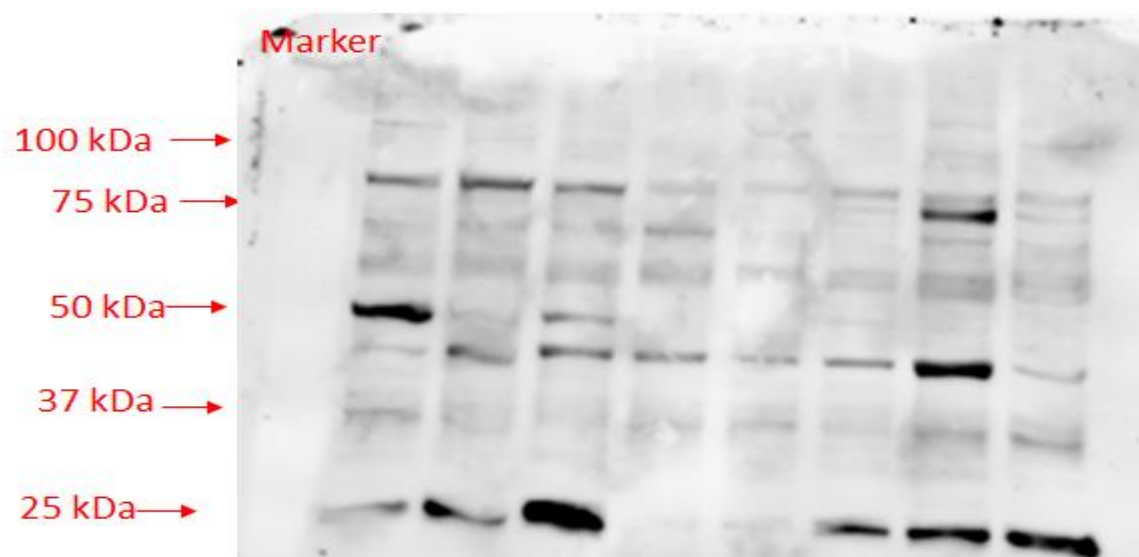

Figure 4A

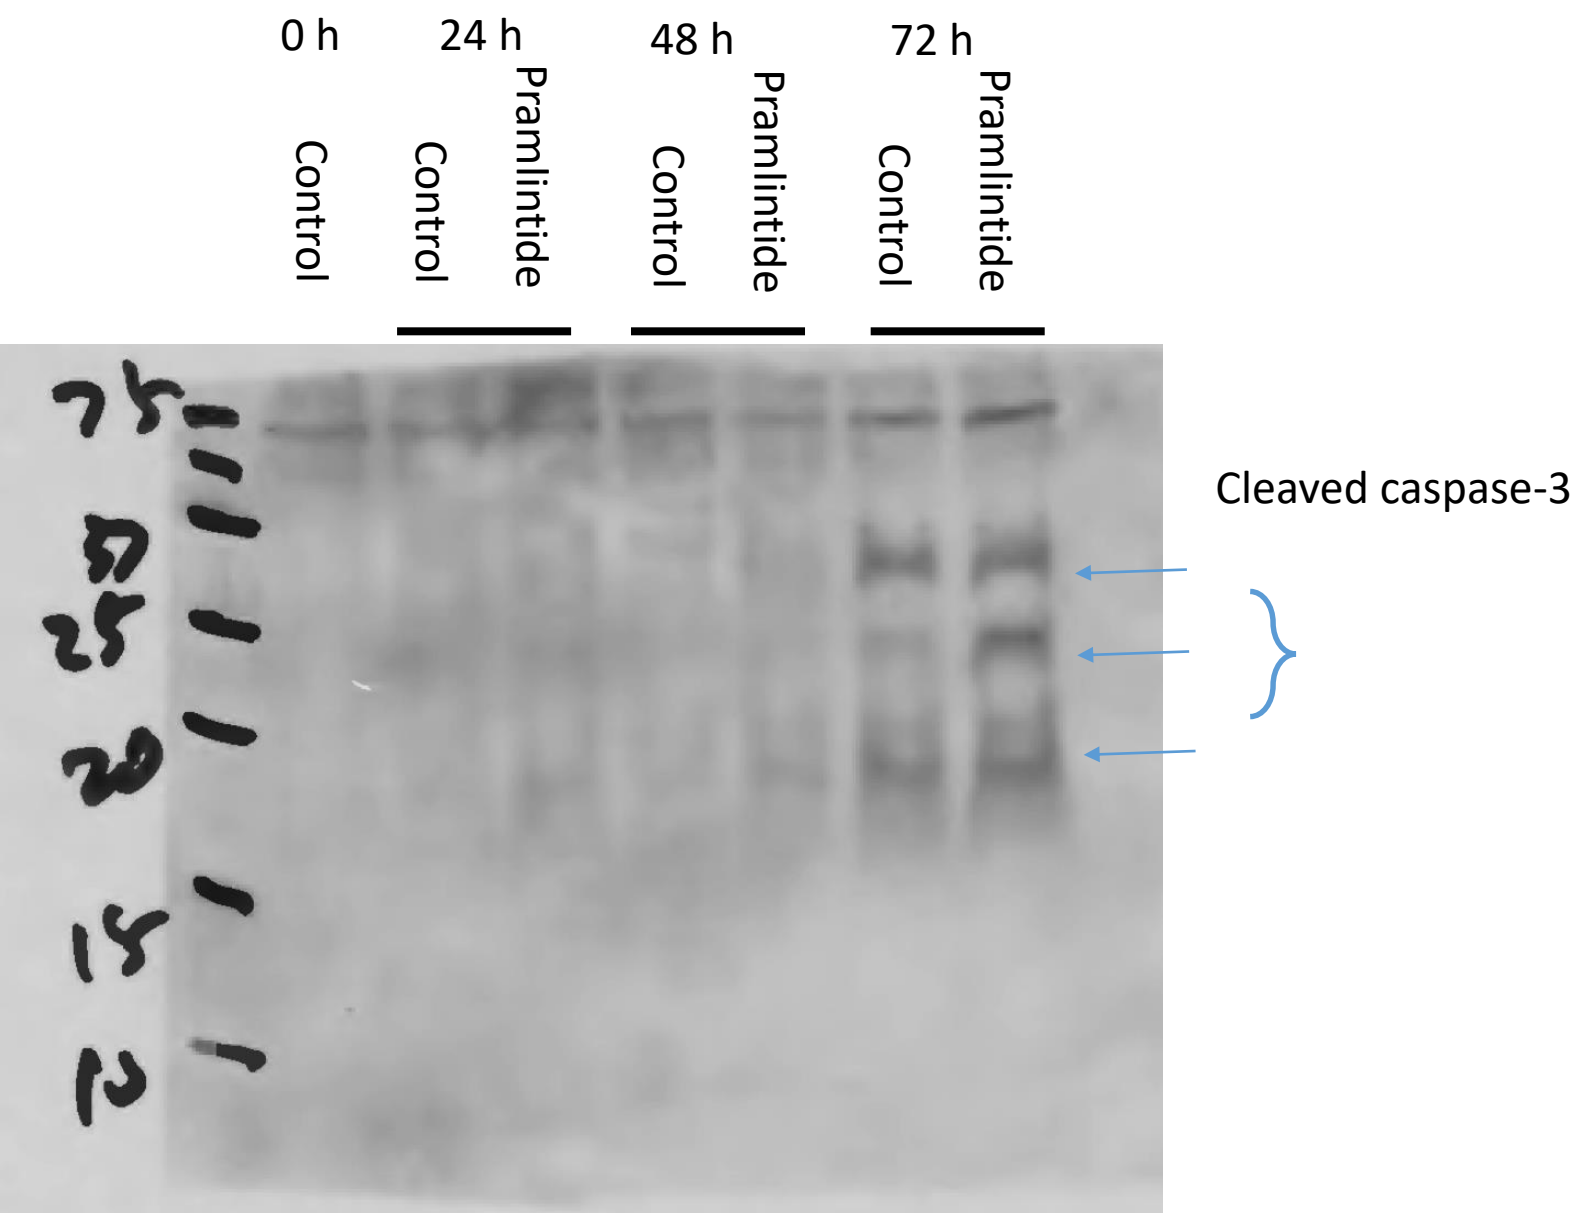

Figure 4B

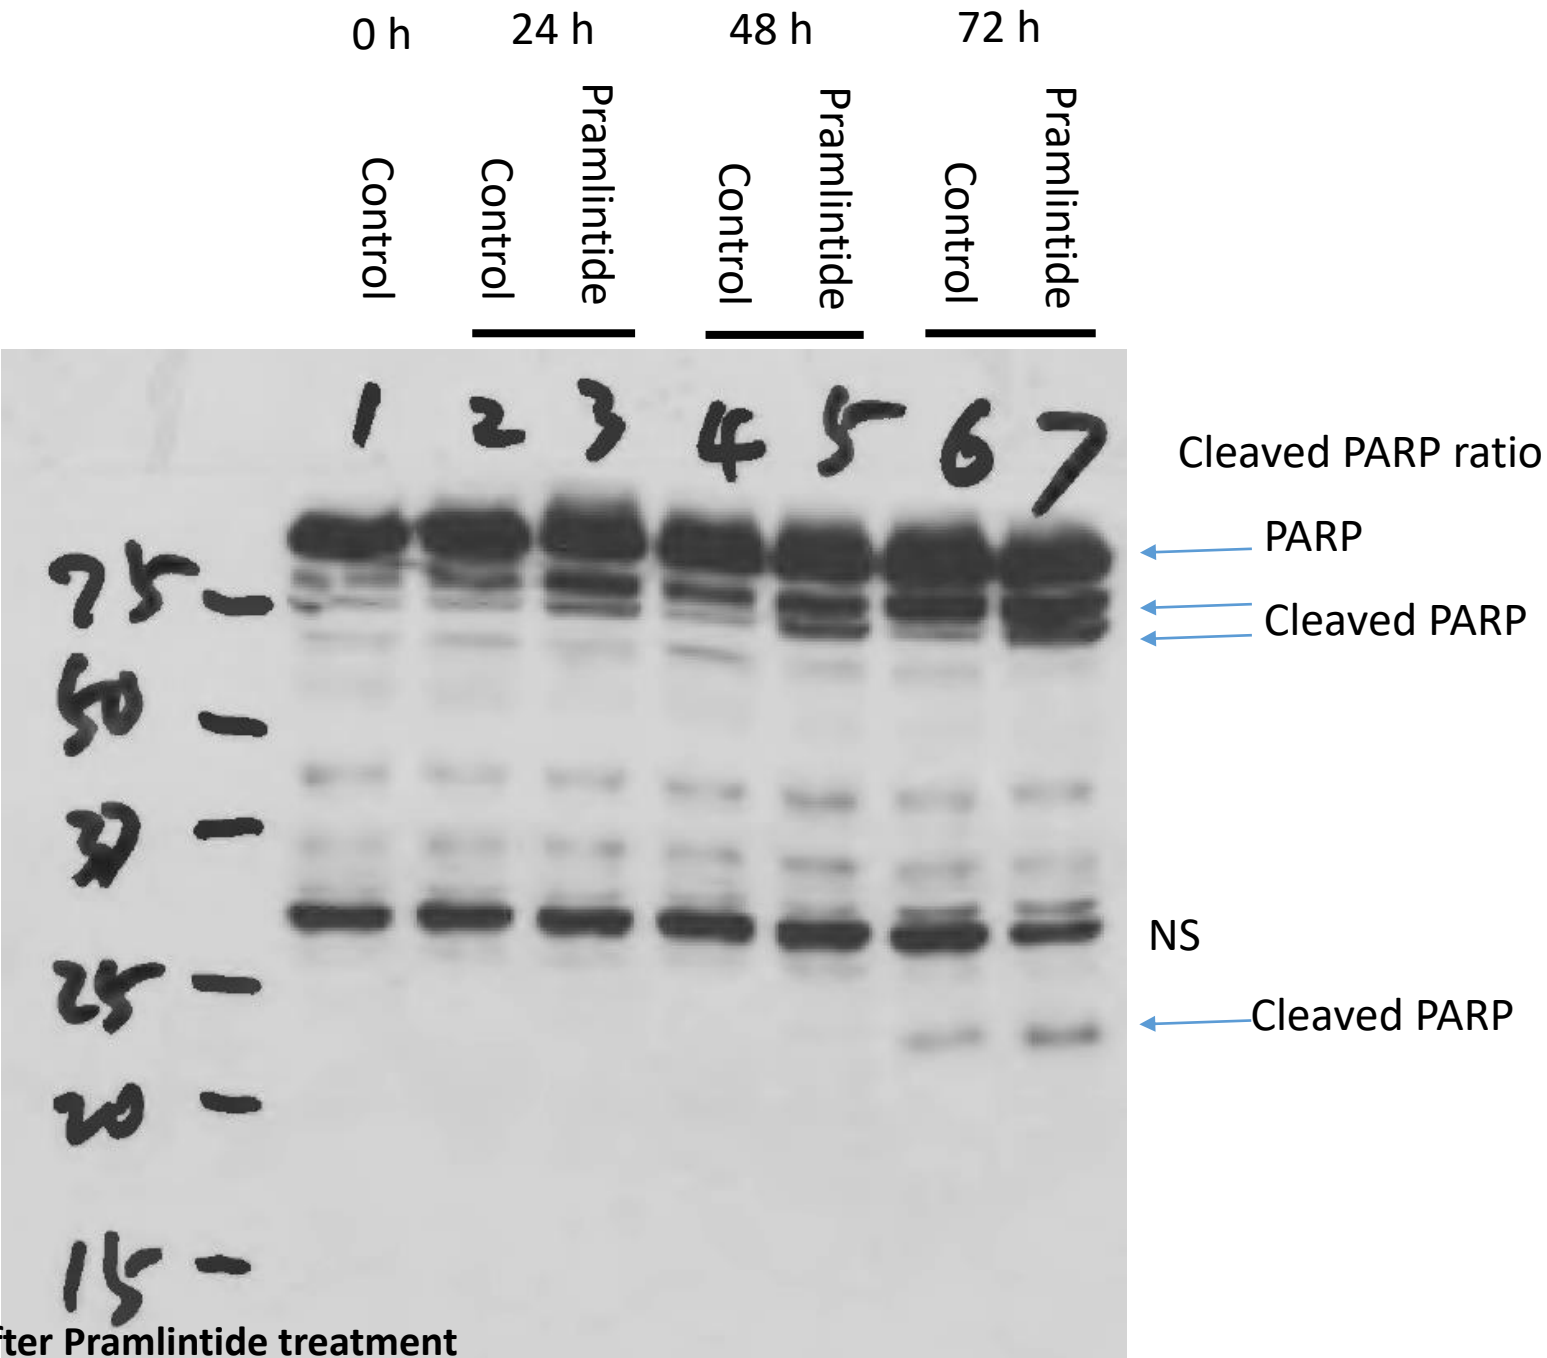

Increased Cleaved PARP in CCH-OSD after Pramlintide treatment



Figure 4C, D, E

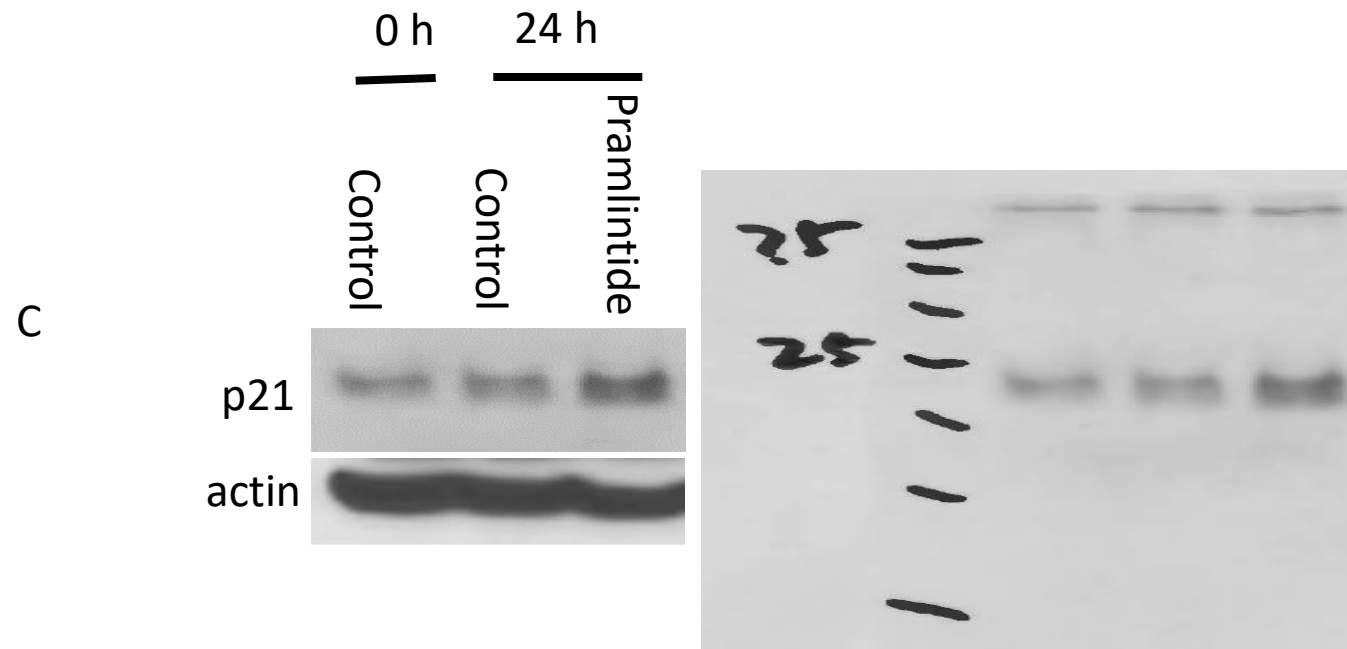

Figure 4C, D, E Increased p21, p27 but not cyclin D3 in CCH-OSD after Pramlintide treatment

Figure 4C, D, E

D

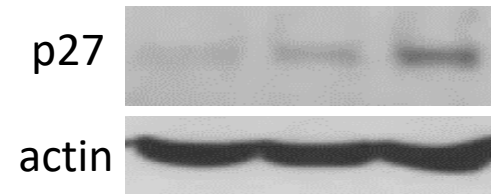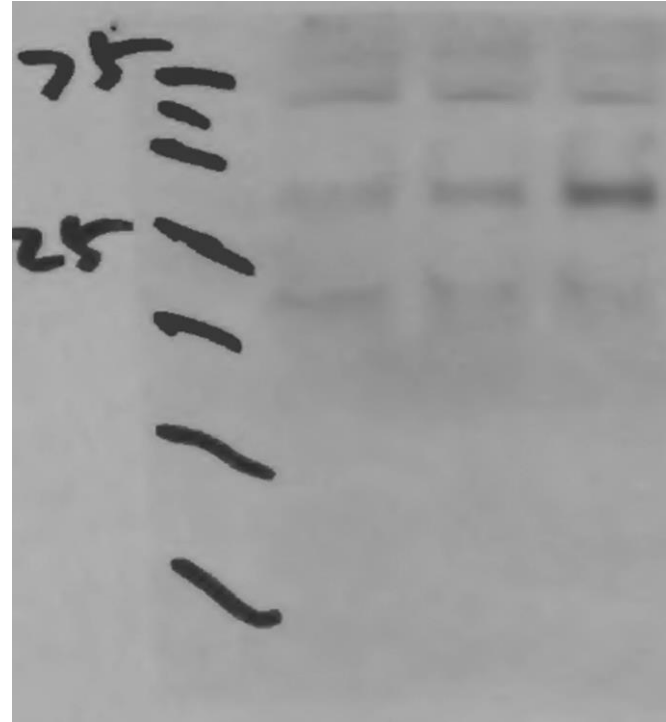

Figure 4C, D, E Increased p21, p27 but not cyclin D3 in CCH-OSD after Pramlintide treatment

Figure 4C, D, E

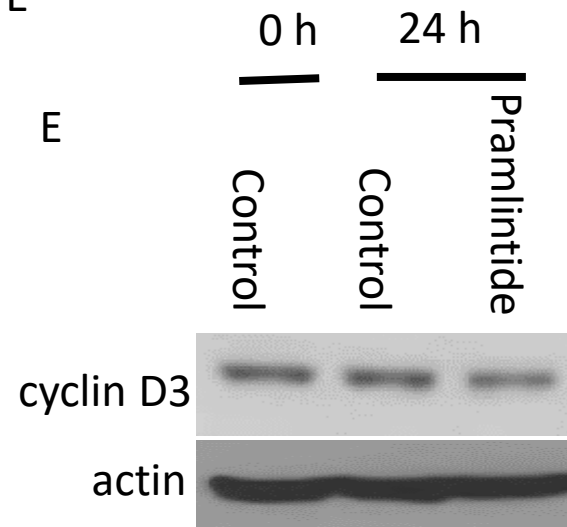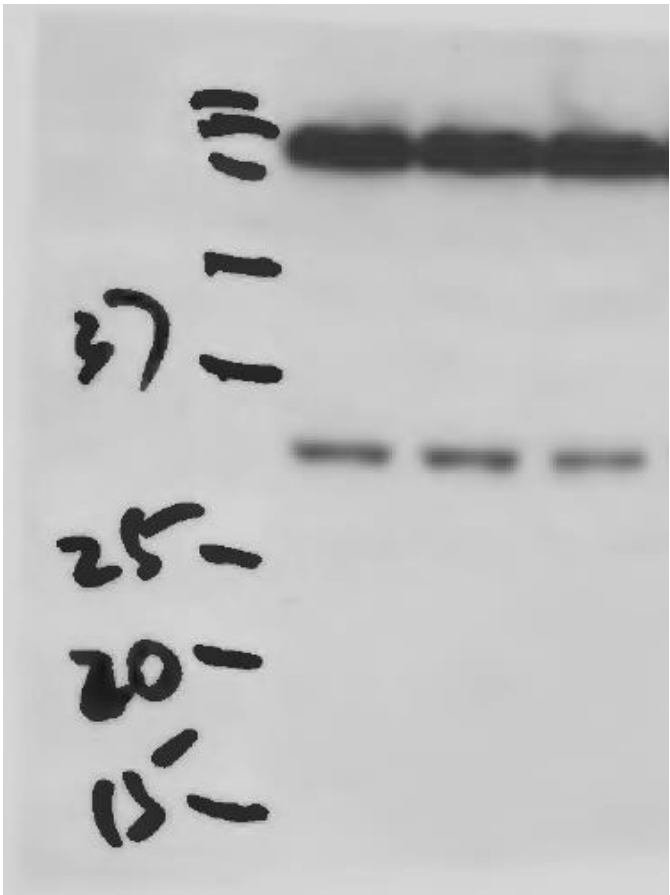

Pramlintide 20ug/ml

Figure 4C, D, E Increased p21, p27 but not cyclin D3 in CCH-OSD after Pramlintide treatment
