# Supplementary material for: Pramlintide: A Novel Therapeutic Approach for Osteosarcoma through Metabolic Reprogramming
Source: MDPI journal article supplement (doi:10.3390/cancers14174310), 2022-09-02

Figure S1

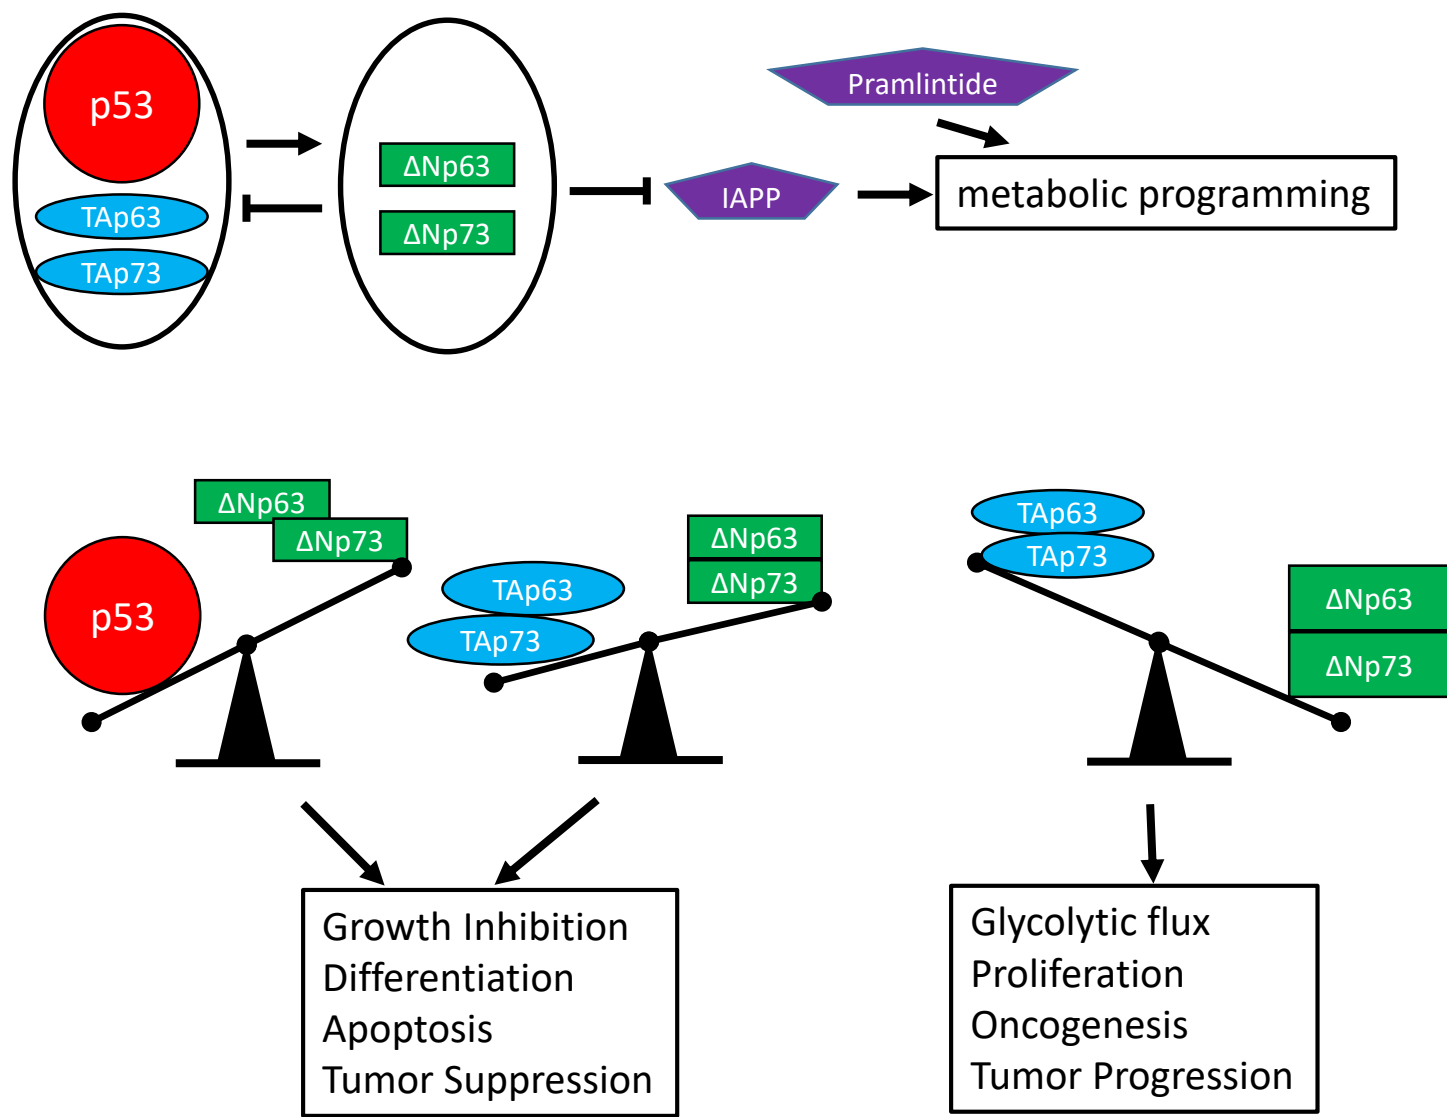

Figure S1. Balance of p53 family for cell control.

Figure S1

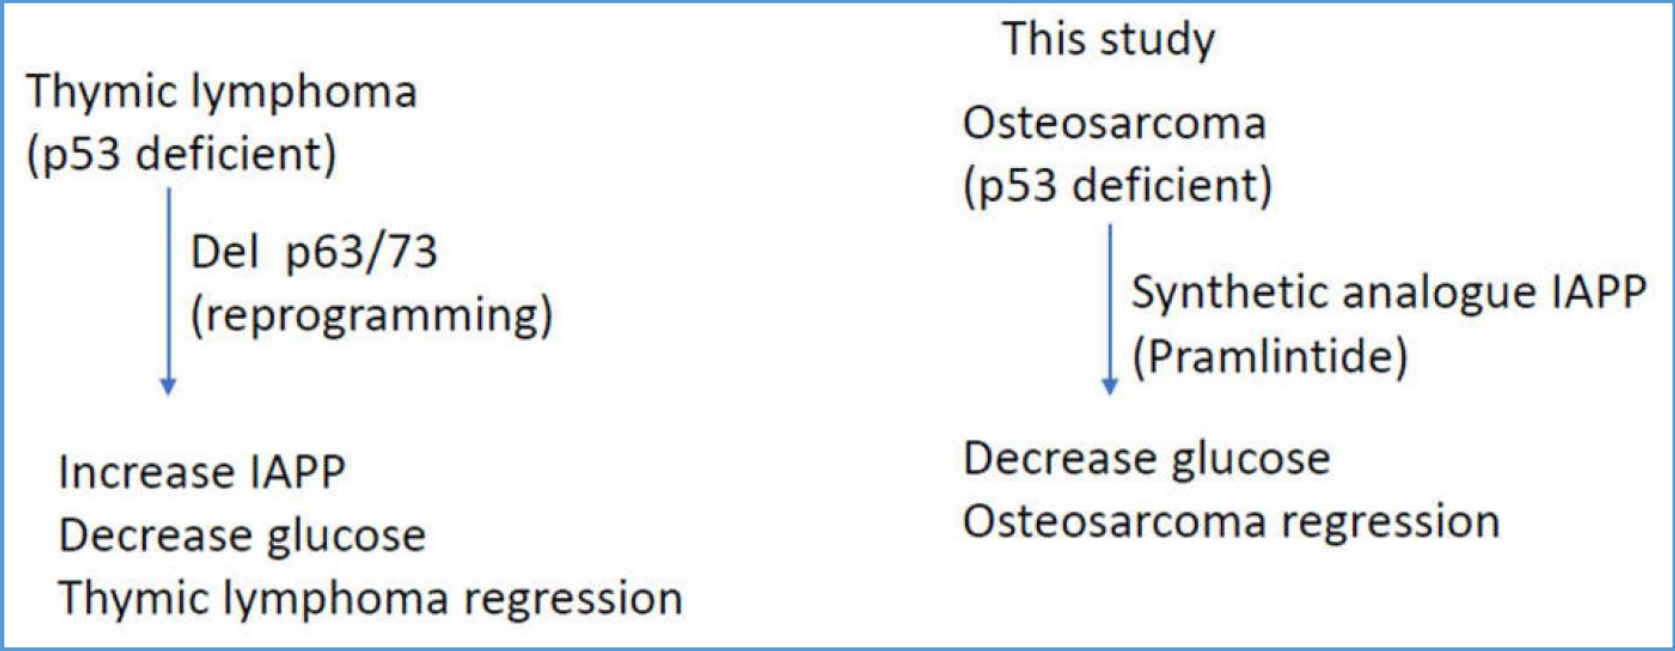

Figure S1. Balance of p53 family for cell control.

Figure S2

Ctrl placebo treatment

Pramlintide treatment

Before treatment

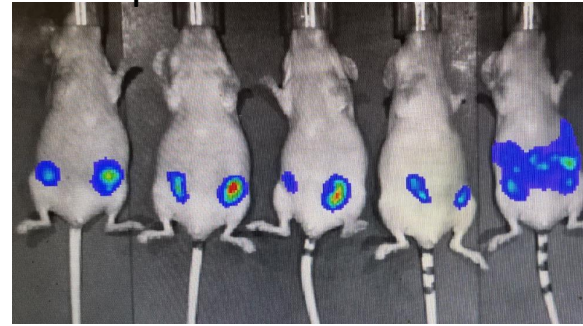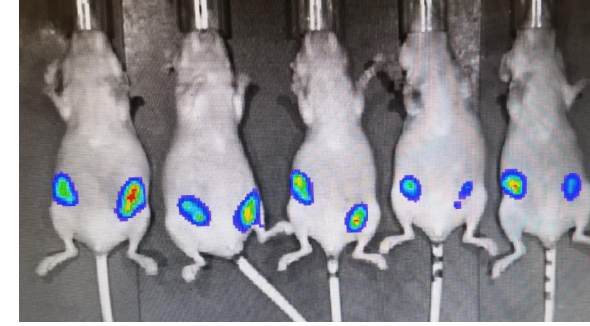

After 2 treatments

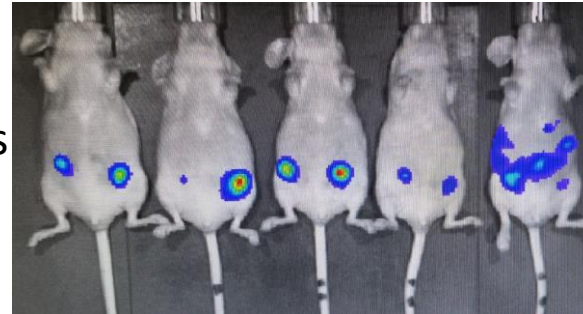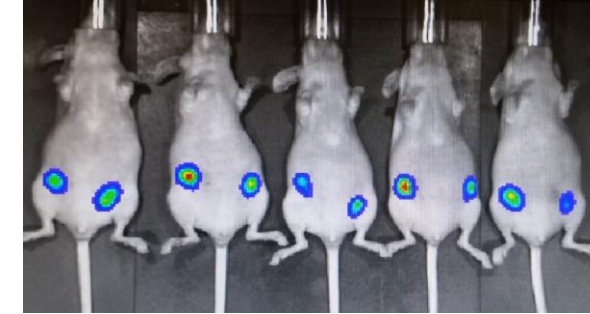

After 4 treatments

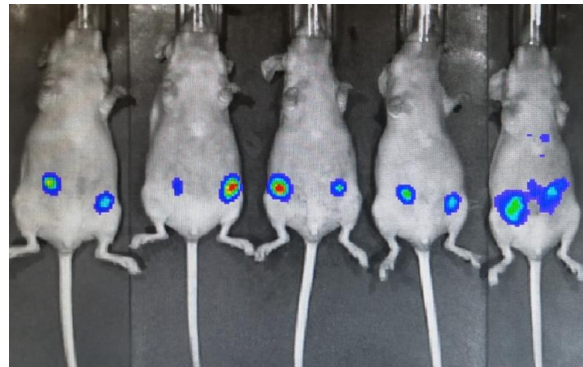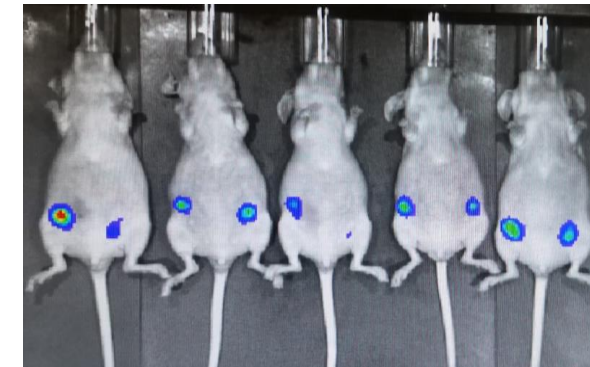

After 6 treatments

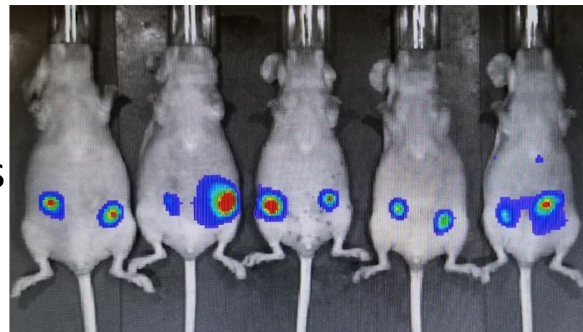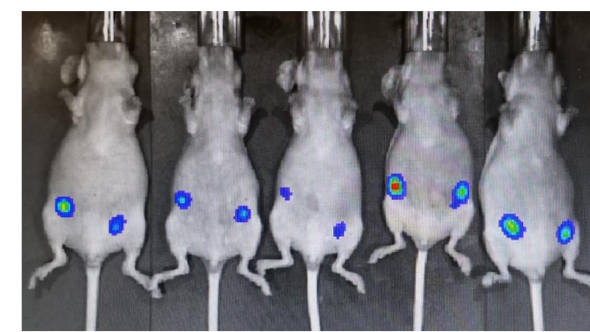

Figure S3 A, B

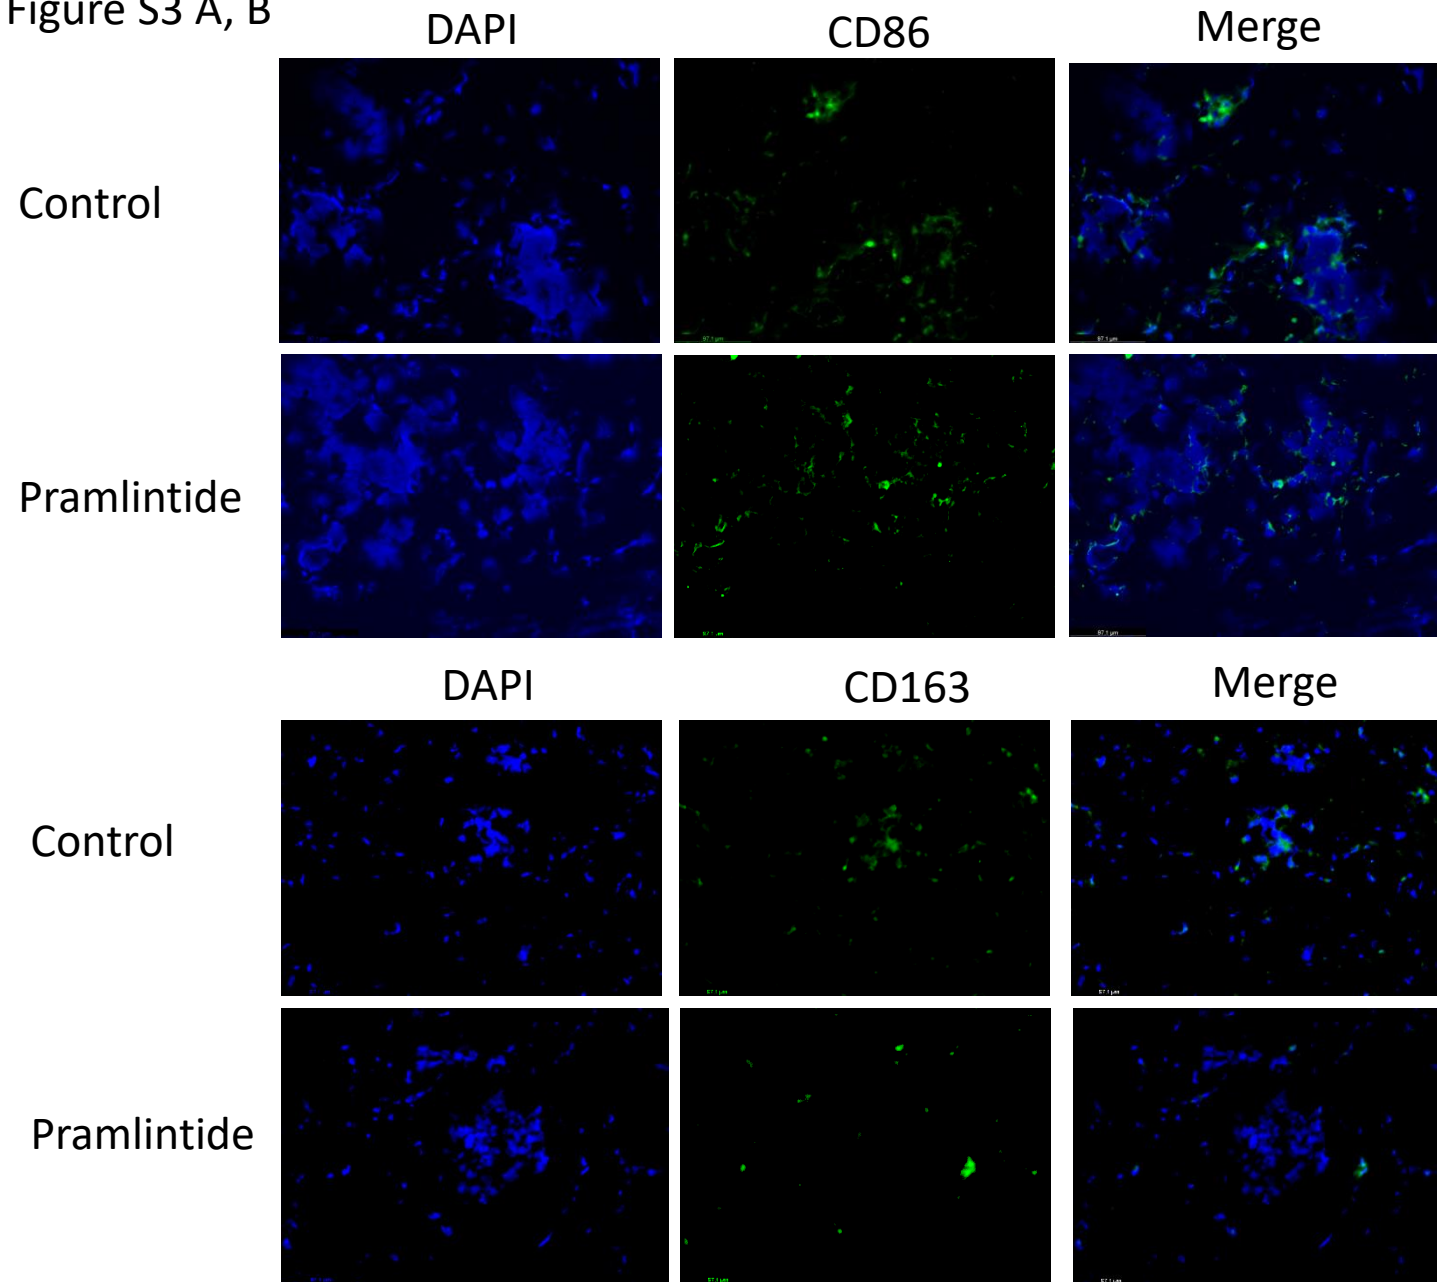

M1(CD86) and M2(CD163) staining

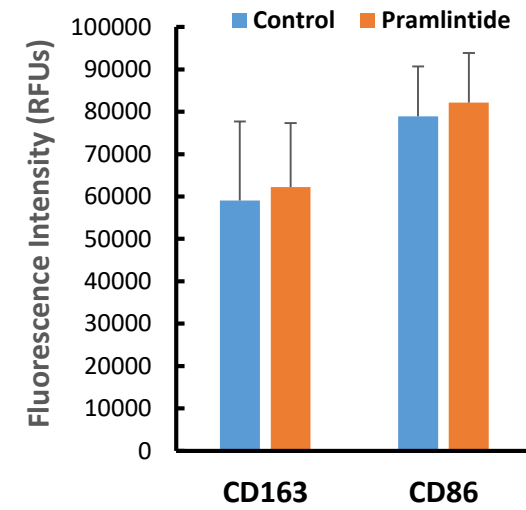

Supplement: s1 [file s1]
